## **Continuous Hypoxia Reduces Retinal Ganglion Cell Degeneration in a Mouse Model of Mitochondrial Optic Neuropathy**

Alexander M. Warwick<sup>1</sup>, Howard M. Bomze<sup>1,2</sup>, Luyu Wang<sup>1</sup>, Mikael Klingeborn<sup>1,3</sup>, Ying Hao<sup>1</sup>, Sandra S. Stinnett<sup>1</sup>, Sidney M. Gospe, III<sup>1</sup>

1 Department of Ophthalmology, Duke University School of Medicine, Durham, NC 27710

2 Department of Pharmacology & Cancer Biology, Duke University School of Medicine, Durham, NC 27710

3 Current address: McLaughlin Research Institute, Great Falls, MT 59405

**Short Title:** Rescue of Complex I-Deficient RGCs by Hypoxia

**Word Count:** 3798

**Key Words:** hypoxia, mitochondria, complex I, Leigh syndrome, Leber hereditary optic neuropathy, retinal ganglion cell

**Section Code:** Retinal cell biology

The authors declare no conflict of interest.

Address correspondence and reprint requests to:

Sidney M. Gospe, III, MD, PhD,  
Department of Ophthalmology,  
Box 3712 Med Center,  
Duke University,  
2351 Erwin Road,  
Durham, NC 27710  
Tel: 919-681-9191  
Fax: 919-684-0547  
E-mail: [sid.gospe@duke.edu](mailto:sid.gospe@duke.edu)

This work was funded by the National Eye Institute via grants EY028610 (S.M.G.), and Core Grant EY005722 (Duke University), a Duke University School of Medicine Strong Start Award (S.M.G.), a Career Development Award from Research to Prevent Blindness (S.M.G.) and an Unrestricted Research to Prevent Blindness Grant (Duke Eye Center).

1 **ABSTRACT**

2 **Purpose:** To test whether continuous hypoxia is neuroprotective to retinal ganglion cells (RGCs)  
3 in a mouse model of mitochondrial optic neuropathy.

4 **Methods:** RGC degeneration was assessed in genetically modified mice in which the *floxed* gene  
5 for the complex I subunit NDUFS4 is deleted from RGCs using *Vglut2*-driven Cre recombinase.  
6 Beginning at postnatal day 25 (P25), *Vglut2-Cre;ndufs4<sup>loxP/loxP</sup>* mice and control littermates were  
7 housed under hypoxia (11% oxygen) or were kept under normoxia (21% oxygen). Survival of  
8 RGC somas and axons was assessed at P60 and P90 via histological analysis of retinal flat  
9 mounts and optic nerve cross sections, respectively. Retinal tissue was also assessed for  
10 neuroinflammation using Western blot and confocal microscopy.

11 **Results:** Consistent with our previous characterization of this model, at least one-third of RGCs  
12 had degenerated by P60 in *Vglut2-Cre;ndufs4<sup>loxP/loxP</sup>* mice remaining under normoxia. However,  
13 continuous hypoxia resulted in complete rescue of RGC somas and axons at this time point, with  
14 normal axonal myelination observed on electron microscopy. Though only partial, hypoxia-  
15 mediated rescue of complex I-deficient RGC somas and axons remained significant at P90.  
16 Hypoxia prevented reactive gliosis at P60, while the retinal accumulation of Iba1-positive  
17 mononuclear inflammatory cells was not substantially reduced.

18 **Conclusions:** Continuous hypoxia achieved dramatic rescue of early RGC degeneration in mice  
19 with severe mitochondrial dysfunction. Although complete rescue was not durable to P90, our  
20 observations suggest that investigating the mechanisms underlying hypoxia-mediated  
21 neuroprotection of RGCs may identify useful therapeutic strategies for optic neuropathies  
22 resulting from less profound mitochondrial impairment, such as Leber Hereditary Optic  
23 Neuropathy.



## 25 INTRODUCTION

26 Mitochondrial dysfunction is an underlying contributor to a variety of optic neuropathies, some  
27 of which arise from heritable mutations.<sup>1,2</sup> The prime example of a mitochondrial optic  
28 neuropathy is Leber Hereditary Optic Neuropathy (LHON), which is characterized by rapidly  
29 progressive, profound vision loss in both eyes due to degeneration of retinal ganglion cells  
30 (RGCs), manifesting most often in adolescents and young adults.<sup>3</sup> LHON is among the most  
31 common mitochondrial diseases, with a reported prevalence of 1:30,000 to 1:50,000.<sup>4-6</sup> With rare  
32 exception,<sup>7,8</sup> it is caused by mutations in the mitochondrial DNA (mtDNA), resulting in partial  
33 loss of function of mitochondrial complex I, a large protein complex localizing to the  
34 mitochondrial inner membrane that is responsible for entry of electrons from NADH into the  
35 electron transport chain. Complex I is composed of seven mtDNA-encoded subunits and at least  
36 37 nuclear-encoded subunits.<sup>9</sup> Loss of complex I activity impairs the oxidative ATP-generating  
37 capacity of cells,<sup>10</sup> and perhaps even more importantly results in the leakage of electrons and the  
38 formation of deleterious reactive oxygen species.<sup>11</sup>

39 LHON has been challenging to model in mammals due to the technical difficulty of  
40 manipulating the mitochondrial genome. Previously characterized animal models have involved  
41 *in vivo* delivery of mutant complex I genes to RGCs by adeno-associated virus or use of  
42 genetically modified mouse lines. These models have demonstrated RGC degeneration, but with  
43 a latency of at least six months and in some cases one to two years, limiting their utility for rapid  
44 screening of potential therapeutic strategies.<sup>12-15</sup> We recently adapted a mouse model of Leigh  
45 syndrome, a severe systemic mitochondrial disease, in order to develop a genetically modified  
46 mouse line with much more rapid RGC degeneration than observed in these LHON models.<sup>16</sup>  
47 Deletion of the nuclear gene *ndufs4*, which encodes an accessory complex I subunit mutated in

48 some forms of Leigh syndrome, severely destabilizes complex I and decreases its enzymatic  
49 activity by >50% in the retina and other tissues.<sup>17-20</sup> This severe compromise of complex I  
50 function produces a more profound phenotype than seen in LHON, with germline *ndufs4*  
51 knockout mice exhibiting a rapidly progressive myoencephalopathy that results in death by  
52 around postnatal day 50 (P50).<sup>18</sup> In order to generate a model of mitochondrial optic neuropathy  
53 in which RGC degeneration could be studied over a longer period, we used Cre recombinase  
54 driven by the vesicular glutamate transporter V-Glut2 to delete *floxed ndufs4* alleles from RGCs.  
55 With complex I dysfunction induced in all RGCs but in only a subset of central nervous system  
56 neurons, the *Vglut2-Cre;ndufs4<sup>loxP/loxP</sup>* conditional knockout mice survive nearly twice as long as  
57 germline knockouts and manifest a rapid degeneration of RGCs that begins ~P45 and progresses  
58 to loss of more than half of RGCs by P90.<sup>16</sup> The onset of acute RGC loss just after the mice  
59 reach sexual maturity is similar to many human cases of LHON and supports the use of this  
60 mouse line as a preclinical model for the disease.

61 The germline *ndufs4<sup>-/-</sup>* mouse line has been very well-studied in recent years, and several  
62 laboratories have reported pharmacological interventions that may prolong the lifespan of these  
63 mice.<sup>21-25</sup> Aside from gene therapy that restores *ndufs4* expression,<sup>26,27</sup> the most successful  
64 therapy described in this mouse model has been to rear the mutant mice under continuous  
65 normobaric hypoxia. Mootha and colleagues have reported that housing the mice at an 11% O<sub>2</sub>  
66 concentration results in prolongation of the median lifespan to 270 days while also reducing  
67 neurological dysfunction.<sup>28,29</sup> It has been proposed that reduction of the O<sub>2</sub> tension at the tissue  
68 level in this mouse model is critical in relieving the burden of reactive oxygen species  
69 formation.<sup>30</sup>

70 As the ocular phenotype has not been reported in hypoxia-treated germline *ndufs4*<sup>-/-</sup> mice, we  
71 were interested to explore the potential therapeutic value of hypoxia in our model of RGC-  
72 specific *ndufs4* deletion. Here we report that an 11% O<sub>2</sub> environment achieved a striking 100%  
73 rescue of RGC soma and axon degeneration at P60, along with a reduction of some signs of  
74 retinal neuroinflammation. While incomplete, therapeutic efficacy remained robust at P90,  
75 indicating that further exploration of the mechanism(s) underlying hypoxia-mediated rescue of  
76 complex I-deficient RGCs may identify promising therapeutic targets for patients with  
77 mitochondrial optic neuropathies, including LHON.

## 78 **METHODS**

### 79 **Animals**

80 All animal experiments adhered to the ARVO Statement for the Use of Animals in Ophthalmic  
81 and Vision Research, following a protocol approved by the Institutional Animal Care and Use  
82 Committee of Duke University. *Vglut2-Cre;ndufs4*<sup>loxP/loxP</sup> mice and control littermates were  
83 generated as previously described<sup>16</sup> and maintained on a C57Bl/6J background.

### 84 **Continuous Hypoxia**

85 For hypoxia experiments, mouse cages were kept within a hypoxia chamber (A-Chamber animal  
86 cage enclosure, BioSpherix, Ltd., Parish, NY) which lowers the ambient PO<sub>2</sub> by pumping in  
87 nitrogen gas to displace the oxygen. Chamber PO<sub>2</sub> level was set to a constant 11% O<sub>2</sub>. For all  
88 experiments, mice born under normoxia were placed into the hypoxia chamber at P25 and  
89 maintained there until P60 or P90, under a 12-hour light-dark cycle. Cages with control  
90 littermates were maintained on their rack under a normoxic 21% O<sub>2</sub> concentration. At the

91 indicated time points, the mice were removed from the hypoxia chamber and rapidly euthanized,  
92 followed by tissue harvesting for histology.

### 93 **Antibodies**

94 The following antibodies were used for immunofluorescence experiments: rabbit polyclonal anti-  
95 RBPMS1 (1:500; Novus, NBP2-20112, Lot#130-96), rabbit polyclonal anti-Iba1 (1:1000;  
96 Fujifilm Wako Chemicals Corp., 019–19741), and rabbit polyclonal anti-GFAP (D1F4Q) XP  
97 (1:200; Cell Signaling Technology, Lot#12389). For Western blot analysis of retinal lysates, the  
98 rabbit polyclonal anti-GFAP (D1F4Q) XP antibody was used at a dilution of 1:1000, and mouse  
99 monoclonal anti- $\beta$ -actin (1:1000; Santa Cruz, sc-47778, Lot#D0615) was used as a loading  
100 control. Secondary antibodies against the appropriate species conjugated to Alexa Fluor 488 or  
101 Alexa Fluor 568 (immunofluorescence experiments, 1:500 dilution) or Alexa Fluor 680 (Western  
102 blot experiments, 1:20,000 dilution) were purchased from Invitrogen. Cell nuclei were stained  
103 using Hoechst 33342 (1:1000, Thermo Fisher Scientific).

### 104 **Histological Techniques**

105 Immunohistochemistry experiments were performed as previously described.<sup>16,31</sup> Briefly,  
106 posterior eyecups obtained from euthanized mice were fixed for 1 h in 4% paraformaldehyde.  
107 Retinal flat mounts were then prepared by isolating the retinas, blocking in 5% goat serum in  
108 PBS with 0.3% Triton X-100, incubating with anti-RBPMS1 primary antibody in block for 5  
109 days at 4°C, and incubating with anti-rabbit Alexa Fluor 488 in block overnight at 4°C. The  
110 retinas were then washed and placed on glass slides with the RGC layer facing up, and four  
111 radial cuts were made from the edge to the equator of each retina to achieve flattening prior to  
112 mounting.

113 Retinal cryosections were prepared by cryoprotecting fixed eyecups in 30% sucrose and then  
114 embedding them in optimal cutting temperature (OCT) medium (Tissue-Tek, Sakura Finetek).  
115 Retinal cross-sections, 20  $\mu\text{m}$  in thickness, were collected using a cryostat microtome (Microm  
116 HM 550, Thermo Fisher Scientific). Sections were rehydrated with PBS, blocked in 5% goat  
117 serum in PBS with 0.3% Triton X-100, and then incubated in primary antibody in the same  
118 blocking solution overnight at 4°C. Sections were washed and incubated with appropriate  
119 secondary antibody conjugated to Alexa Fluor 488 overnight at 4°C, and washed prior to  
120 mounting.

121 All samples were mounted with Immu-Mount (Thermo Fisher Scientific) under glass  
122 coverslips. Images were acquired using a Nikon Eclipse Ti2 inverted confocal microscope, a CFI  
123 Plan Fluor 60 $\times$  (oil) objective, and an A1 confocal scanner controlled by NIS-Elements software  
124 (Nikon). For RGC soma quantification in retinal flat mounts, images of 45,000  $\mu\text{m}^2$  in area were  
125 obtained in each quadrant at locations of 0.5, 1.0, and 1.5 mm from the optic nerve head, and  
126 RGC somas were manually counted using the Cell Counter plugin for Fiji.<sup>32</sup> RGC soma density  
127 was averaged among the four quadrants at each distance from the optic nerve head. For  
128 quantification of Iba1-positive cells, retinal cross sections were imaged along their entire length,  
129 and the number of labeled cells within the ganglion cell and inner plexiform layers was  
130 quantified in 3–4 retinal sections per sample (taken through the optic nerve head), then averaged.  
131 For quantification of GFAP-positive radial processes of Müller glia, 45,000  $\mu\text{m}^2$  images were  
132 acquired at a 500- $\mu\text{m}$  distance to either side of the optic nerve head for 3 sections per sample.  
133 The number of positive radial processes present at the inner nuclear layer/inner plexiform layer  
134 junction was counted for each section and averaged.

135 To assess RGC axons, mouse optic nerves were obtained from euthanized mice that had  
136 undergone transcardial perfusion with 4% PFA and then post-fixed for an additional two hours in  
137 2% paraformaldehyde and 2% glutaraldehyde in PBS. Samples were embedded in the Embed-  
138 812 resin mixture and sectioned on an ultramicrotome (LKB Ultratome V; Leica, Paris, France)  
139 using a glass knife. Cross-sections of 0.27  $\mu\text{m}$  thickness were stained with 1% methylene blue.  
140 Axon cross section images were obtained using a Nikon Ti2 Eclipse microscope and NIS-  
141 Elements imaging software (Nikon). For each optic nerve cross section, 4 images obtained using  
142 a 60X (oil) objective were stitched in order to capture the entire nerve. This was performed on  
143 three cross sections per optic nerve, to ensure consistency. Axon count analysis was performed  
144 using the AxoNet plugin for ImageJ.<sup>33</sup> The final axon count was averaged over the three cross-  
145 sections and then divided by the total optic nerve area to determine mean axon density per nerve.

146 The same mouse optic nerve specimens were thinly sectioned (60-80 nm) for transmission  
147 electron microscopy. Samples were collected on copper grids, counterstained with uranyl acetate  
148 and Sato's lead, and then examined using an electron microscope (JEM-1400; JEOL) at 60 kV.  
149 Images were collected using a charge-coupled device camera (Orius; Gatan).

#### 150 **Western Blot for GFAP Quantification**

151 To quantify GFAP protein abundance, freshly dissected retinas were sonicated in lysis buffer [25  
152 mM HEPES buffer, pH 7.4, 150 mM NaCl, 5 mM  $\text{MgCl}_2$ , and protease inhibitors (Complete  
153 Mini, Roche, Indianapolis, IN) with 1% Triton X-100] and the protein concentration of each  
154 lysate was determined with a colorimetric assay (Bio-Rad). After mixing with SDS-PAGE  
155 sample buffer, four retinal lysates from each experimental group were separated on 10–20%  
156 SDS-PAGE gels, transferred onto polyvinylidene fluoride (PVDF) membranes and blotted with  
157 the indicated primary antibodies overnight. Membranes were washed in 0.05% Tween 20 and

158 incubated with the appropriate secondary antibody for two hours. The Odyssey CLx imaging  
159 system (LiCor) was used to image and quantify band intensities. For each sample, the intensity  
160 of the GFAP band was normalized to that of the band for  $\beta$ -actin, which served as the loading  
161 control.

## 162 **Experimental Design and Statistical Analysis**

163 Histological assessment of RGC soma and axon survival was performed on *Vglut2-*  
164 *Cre;ndufs4<sup>loxP/loxP</sup>* and littermate control mice with both sexes represented. In these experiments,  
165 8-14 retinas or optic nerves were analyzed for each genotype and O<sub>2</sub> concentration at each time  
166 point. Histological quantification of GFAP localization within Müller glia processes and Iba1-  
167 positive mononuclear cells in the inner retina was performed in 4 or 5 retinas for each genotype,  
168 O<sub>2</sub> concentration, and time point. In all quantitative histological analyses, the observer was  
169 masked to the identity of each sample. For all experiments, statistical comparisons between  
170 groups were made with the Wilcoxon rank sum test to account for non-parametric data. All data  
171 analysis for this study was generated using SAS/STAT software, Version 9.4 of the SAS System  
172 for Windows (SAS Institute, Inc.). Data are presented graphically as mean  $\pm$  SEM.

173

## 174 **RESULTS**

175 **Hypoxia achieves complete histological rescue of RGCs in *Vglut2-Cre;ndufs4<sup>loxP/loxP</sup>* mice at**  
176 **P60 and remains therapeutic at P90.** We have previously observed that RGC somas and axons  
177 develop normally in *Vglut2-Cre;ndufs4<sup>loxP/loxP</sup>* mice, with no histological phenotype at P30 and  
178 only mild degeneration observed at P45.<sup>16</sup> Given the absence of early degeneration prior to  
179 weaning, we elected to initiate continuous hypoxia at P25. *Vglut2-Cre;ndufs4<sup>loxP/loxP</sup>* mice and  
180 control *ndufs4<sup>loxP/loxP</sup>* littermates lacking Cre recombinase were subjected to normoxia (21% O<sub>2</sub>)

181 or hypoxia (11% O<sub>2</sub>) through P60. At this age, the conditional knockout mice did not manifest an  
182 overt neurological phenotype under either oxygen concentration, consistent with prior  
183 observations.<sup>16,34</sup> RGC soma density was assessed on retinal flat mounts stained with the RGC  
184 marker RBPMS1 (Fig. 1A). As we had observed previously, *Vglut2-Cre;ndufs4<sup>loxP/loxP</sup>* mice  
185 raised entirely under normoxia demonstrated a reduction of RGC density by approximately one-  
186 third, and this was observed at locations proximal, intermediate, and distal from the optic nerve  
187 head ( $p \leq 0.01$  for all locations; Fig. 1B). In contrast, no degeneration of RGC somas was  
188 observed when mice were treated with hypoxia; the soma density was indistinguishable between  
189 *Vglut2-Cre;ndufs4<sup>loxP/loxP</sup>* housed at 11% O<sub>2</sub> from P25 to P60 and control *ndufs4<sup>loxP/loxP</sup>* mice  
190 exposed to either O<sub>2</sub> concentration.

191 To determine the durability of the hypoxia-mediated RGC rescue, additional cohorts of mice  
192 were analyzed at P90, the latest time point at which the normoxic *Vglut2-Cre;ndufs4<sup>loxP/loxP</sup>* mice  
193 could be assessed prior to death. At this time point, the conditional knockout mice maintained  
194 under normoxia were ataxic and manifested stiffness of the limbs, whereas those housed at 11%  
195 O<sub>2</sub> had a grossly normal systemic phenotype. Further RGC loss of approximately 45% was  
196 observed in *Vglut2-Cre;ndufs4<sup>loxP/loxP</sup>* mice raised entirely under normoxia (Fig. 2A,B). In  
197 contrast to the earlier time point of P60, the rescue of RGC degeneration by hypoxia was no  
198 longer complete at P90; however, the extent of RGC soma loss was reduced by >50% at all three  
199 locations within the retina ( $p < 0.001$  for all). In this experiment, cohorts of heterozygous *Vglut2-*  
200 *Cre;ndufs4<sup>loxP/+</sup>* mice were also included, in order to verify that loss of only one copy of *ndufs4*  
201 in RGCs is aphenotypic and that expression of Cre recombinase itself had no effect on our  
202 analyses. Consistent with prior reports of a normal systemic phenotype in heterozygous germline  
203 *ndufs4<sup>+/-</sup>* mice,<sup>30</sup> we observed that RGC soma and axon density were completely normal at P90

204 regardless of the ambient O<sub>2</sub> concentration, confirming that this genotype may serve as a useful  
205 control in future experiments, as it allows for more efficient breeding of experimental mice.

206 **Continuous hypoxia reduces axonal degeneration in *Vglut2-Cre;ndufs4<sup>loxP/loxP</sup>* mice.** As a  
207 complementary assessment of the neuroprotective effect of hypoxia on RGCs from *Vglut2-*  
208 *Cre;ndufs4<sup>loxP/loxP</sup>* mice, optic nerve cross-sections were obtained in order to quantify RGC axon  
209 density and to assess for morphological rescue. At P60 axon density was reduced by 58% in the  
210 optic nerves of normoxic *Vglut2-Cre;ndufs4<sup>loxP/loxP</sup>* mice compared to *Vglut2-Cre;ndufs4<sup>loxP/+</sup>*  
211 control mice, whereas the axon density was significantly increased in the knockouts raised under  
212 hypoxia (p<0.001) and no different from the controls (Fig. 3A,B). Electron microscopy revealed  
213 reduced axon density with increased surrounding fibrosis and abnormal myelination patterns in  
214 the optic nerves of normoxic *Vglut2-Cre;ndufs4<sup>loxP/loxP</sup>* mice (Fig. 3C). In contrast, an orderly,  
215 healthy appearance of myelinated RGC axons was observed in hypoxic *Vglut2-Cre;ndufs4<sup>loxP/loxP</sup>*  
216 mice, indistinguishable from that of control littermates.

217 Consistent with our analysis of RGC somas, a partial rescue of RGC axons was apparent at  
218 P90. While the hypoxia-treated *Vglut2-Cre;ndufs4<sup>loxP/loxP</sup>* mice exhibited a 32% reduction in axon  
219 density compared to controls mice, this represented a rescue of 45% of the axons lost under  
220 normoxic conditions (Fig. 4A,B). Ultrastructural analysis of the optic nerves via electron  
221 microscopy demonstrated the interim development of abnormal myelination patterns in the  
222 hypoxia-raised *Vglut2-Cre;ndufs4<sup>loxP/loxP</sup>* mice at P90 compared to the P60 time point; however,  
223 the morphological abnormalities were demonstrably less severe than in the cohort kept  
224 continuously under normoxia (Fig. 4C).

225 **Hypoxia partially reduces retinal neuroinflammation in *Vglut2-Cre;ndufs4<sup>loxP/loxP</sup>* retinas.** A  
226 recent study in germline *ndufs4<sup>-/-</sup>* mice found evidence that reducing neuroinflammation by

227 depleting leukocytes had a dramatic therapeutic effect, prolonging lifespan and reducing  
228 neurologic dysfunction in the mice.<sup>35</sup> Notably, it has also been shown in the germline *ndufs4*<sup>-/-</sup>  
229 mouse<sup>36</sup> and in our *Vglut2-Cre;ndufs4*<sup>loxP/loxP</sup> conditional knockout mouse line<sup>16</sup> that reactive  
230 gliosis and inner retinal accumulation of Iba1-positive mononuclear inflammatory cells occur  
231 alongside RGC degeneration. Given the neuroprotective effect of hypoxia on *ndufs4*-deficient  
232 RGCs, we wondered whether continuous hypoxia would produce a similar reduction of retinal  
233 neuroinflammation in *Vglut2-Cre;ndufs4*<sup>loxP/loxP</sup> mice. As before, the *Vglut2-Cre;ndufs4*<sup>loxP/loxP</sup>  
234 mice and control *Vglut2-Cre;ndufs4*<sup>loxP/+</sup> littermates were exposed to either 21% O<sub>2</sub> or 11% O<sub>2</sub>  
235 from P25 until harvesting of ocular tissue at P60 or P90. Reactive gliosis was determined by  
236 assessing for up-regulation of glial fibrillary acidic protein (GFAP), an intermediate filament  
237 expressed constitutively by retinal astrocytes and detectable in Müller glia as a response to  
238 retinal pathology. At P60, the abundance of GFAP protein was increased in the retinas of *Vglut2-*  
239 *Cre;ndufs4*<sup>loxP/loxP</sup> mice raised under normoxia by four-fold compared to *Vglut2-Cre;ndufs4*<sup>loxP/+</sup>  
240 controls (p<0.05), whereas the retinal GFAP protein level in hypoxic *Vglut2-Cre;ndufs4*<sup>loxP/loxP</sup>  
241 mice was not increased (Fig. 5A). Consistently, while radial localization of up-regulated GFAP  
242 in Müller cells was not observed in control *Vglut2-Cre;ndufs4*<sup>loxP/+</sup> mice, it was readily identified  
243 in retinal sections obtained from *Vglut2-Cre;ndufs4*<sup>loxP/loxP</sup> mice raised under normoxia, but not  
244 hypoxia at P60 (Fig. 5B). Similar to the partial hypoxia-mediated rescue of RGC somas seen at  
245 P90, GFAP up-regulation was not completely prevented at this time point but was reduced by  
246 two-fold (p<0.05) (Fig. 5C). The number of GFAP-positive Müller radial processes was also  
247 intermediate in P90 *Vglut2-Cre;ndufs4*<sup>loxP/loxP</sup> mice treated with hypoxia compared to controls  
248 and *Vglut2-Cre;ndufs4*<sup>loxP/loxP</sup> mice raised under normoxia (Fig. 5D).

249 The effect of hypoxia on inner retinal Iba1-positive mononuclear cell accumulation in  
250 *Vglut2-Cre;ndufs4<sup>loxP/loxP</sup>* mice was less pronounced. As we previously observed,<sup>16</sup> there was a  
251 significant >2-fold increase in Iba1-positive cell abundance in P60 *Vglut2-Cre;ndufs4<sup>loxP/loxP</sup>*  
252 retinas under normoxia compared to controls; however, an intermediate abundance was observed  
253 at this early time point in mutant mice raised under hypoxia that was not significantly lower than  
254 those raised under normoxia (Fig. 5E). By P90, mononuclear cell accumulation in the inner  
255 retina in *Vglut2-Cre;ndufs4<sup>loxP/loxP</sup>* mice was identical regardless of O<sub>2</sub> concentration. Our  
256 observations suggest that RGC dysfunction in the setting of complex I deficiency may induce an  
257 early inflammatory response that is anticipatory to overt RGC death.

258

## 259 DISCUSSION

260 In this study, we have shown that continuous hypoxia is neuroprotective when applied prior to  
261 the onset of RGC degeneration in mice with RGC-specific deletion of *ndufs4*. With hypoxia  
262 treatment, no discernible loss of RGC somas or axons was observed at P60, a time point at which  
263 approximately one-third of RGCs have degenerated in *Vglut2-Cre;ndufs4<sup>loxP/loxP</sup>* mice raised  
264 entirely under normoxia. Compared to the systemic phenotypes of germline *ndufs4<sup>-/-</sup>* mice (e.g.  
265 ataxia, stiffness, inactivity, weight loss, early death), which have been reported to be delayed by  
266 a half-year or more by hypoxia,<sup>28,29</sup> the therapeutic effect on optic atrophy in *Vglut2-*  
267 *Cre;ndufs4<sup>loxP/loxP</sup>* mice is more time-limited, as the 100% rescue of RGCs observed at P60  
268 diminished to approximately 50% after one additional month, with accompanying signs of  
269 reactive gliosis by astrocytes and Müller cells.

270 Another interesting finding in our study is a trend toward an increase in mononuclear  
271 inflammatory cell accumulation in the inner retinas of *Vglut2-Cre;ndufs4<sup>loxP/loxP</sup>* mice at P60

272 despite 100% RGC rescue by hypoxia. As the complex I deficiency in this mouse model is  
273 intrinsic to RGCs, it seems likely that dysfunctional RGCs release proinflammatory signals prior  
274 to their degeneration. Indeed, a previous global gene expression analysis of the retinas of  
275 germline *ndufs4*<sup>-/-</sup> mice at P33 (prior to the onset of RGC degeneration) found inflammatory and  
276 immune-related pathways to be the most highly up-regulated compared to control retinas.<sup>36</sup>  
277 Extrapolating from the significant benefits of inflammatory cell depletion on the neurological  
278 phenotype of germline *ndufs4*<sup>-/-</sup> mice,<sup>35</sup> it may be that the retinal accumulation of mononuclear  
279 inflammatory cells (which has become maximal by P90 even with hypoxia treatment)  
280 exacerbates the degeneration of complex I-deficient RGCs. This raises the possibility that  
281 hypoxia and anti-inflammatory interventions might have additive or even synergistic therapeutic  
282 effects. Alternatively, it could be the case that the neuroprotective effect of hypoxia that we  
283 observed is entirely mediated by a reduction in neuroinflammation.

284       Regarding the more moderate reduction of optic atrophy by hypoxia in *Vglut2*-  
285 *Cre;ndufs4*<sup>loxP/loxP</sup> mice compared to the much more prolonged systemic improvement in  
286 germline *ndufs4*<sup>-/-</sup> mice, the most likely explanation is an exquisite sensitivity of RGCs to  
287 chronic complex I dysfunction. This notion is supported by the well-documented observation  
288 that, in the setting of the milder insults to complex I function associated with LHON, most  
289 patients develop optic atrophy in the absence of other neurological or systemic symptoms.<sup>37</sup> In  
290 this context, the time-limited therapeutic effect of hypoxia on *ndufs4*-deficient RGCs may still  
291 hold significant relevance to developing treatments for LHON, as hypoxia-mediated  
292 neuroprotection of RGCs with milder complex I dysfunction could prove more durable. An  
293 important next step, therefore, would be to conduct a long-term assessment of the effect of

294 hypoxia on the more slowly-developing optic neuropathies characteristic of the mouse models  
295 with LHON-associated mutations in complex I subunits.<sup>12,13</sup>

296 A longer-term goal will be to elucidate the mechanism(s) underlying the salutary effect of  
297 hypoxia on complex I-deficient RGCs. This might involve a decrease in cellular oxidative stress  
298 via a generalized reduction of the availability of molecular oxygen at the tissue level.<sup>30,38</sup>

299 Alternatively, RGC neuroprotection by hypoxia may arise from modulation of cellular  
300 metabolism or other features of mitochondrial biology due to activation of specific molecular  
301 pathways as an adaptation to hypoxia. A mechanistic understanding of this process could  
302 ultimately lead to targeted pharmacological interventions that could protect RGCs with  
303 mitochondrial impairment while potentially obviating the need for direct hypoxia.

304 In summary, we have demonstrated robust *in vivo* neuroprotection of complex I-deficient  
305 RGCs by continuous exposure to hypoxia. Our observations indicate that identifying the relevant  
306 cellular processes modulated by hypoxia may represent a critical step in addressing the unmet  
307 need of developing effective therapies for mitochondrial optic neuropathies like LHON.

308

## 309 **ACKNOWLEDGEMENTS**

310 The authors would like to thank Vadim Arshavsky for critical review of the manuscript.

311

## 312 **REFERENCES**

- 313 1. Kamel K, Farrell M, O'Brien C. Mitochondrial dysfunction in ocular disease: Focus on  
314 glaucoma. *Mitochondrion*. 2017;35:44-53.

- 315
- 316 2. Yu-Wai-Man P, Newman NJ. Inherited eye-related disorders due to mitochondrial  
317 dysfunction. *Hum Mol Genet.* 2017;26:R12-R20.
- 318
- 319 3. Wallace DC, Lott MT. Leber hereditary optic neuropathy: Exemplar of an mtdna disease.  
320 *Handb Exp Pharmacol.* 2017;240:339-376.
- 321
- 322 4. Gorman GS, Schaefer AM, Ng Y, et al. Prevalence of nuclear and mitochondrial DNA  
323 mutations related to adult mitochondrial disease. *Ann Neurol.* 2015;77:753-759.
- 324
- 325 5. Rosenberg T, Norby S, Schwartz M, et al. Prevalence and genetics of leber hereditary  
326 optic neuropathy in the danish population. *Invest Ophthalmol Vis Sci.* 2016;57:1370-  
327 1375.
- 328
- 329 6. Yu-Wai-Man P, Griffiths PG, Brown DT, Howell N, Turnbull DM, Chinnery PF. The  
330 epidemiology of leber hereditary optic neuropathy in the north east of england. *Am J*  
331 *Hum Genet.* 2003;72:333-339.
- 332
- 333 7. Mansukhani SA, Mehta DG, Renaud DL, Whealy MA, Chen JJ, Bhatti MT. Nuclear  
334 DNA mutation causing a phenotypic leber hereditary optic neuropathy plus.  
335 *Ophthalmology.* 2021;128:628-631.
- 336

- 337 8. Stenton SL, Sheremet NL, Catarino CB, et al. Impaired complex i repair causes recessive  
338 leber's hereditary optic neuropathy. *J Clin Invest.* 2021;131.
- 339
- 340 9. Wirth C, Brandt U, Hunte C, Zickermann V. Structure and function of mitochondrial  
341 complex i. *Biochim Biophys Acta.* 2016;1857:902-914.
- 342
- 343 10. Baracca A, Solaini G, Sgarbi G, et al. Severe impairment of complex i-driven adenosine  
344 triphosphate synthesis in leber hereditary optic neuropathy cybrids. *Arch Neurol.*  
345 2005;62:730-736.
- 346
- 347 11. Bahr T, Welburn K, Donnelly J, Bai Y. Emerging model systems and treatment  
348 approaches for leber's hereditary optic neuropathy: Challenges and opportunities.  
349 *Biochim Biophys Acta Mol Basis Dis.* 2020;1866:165743.
- 350
- 351 12. Lin CS, Sharpley MS, Fan W, et al. Mouse mtdna mutant model of leber hereditary optic  
352 neuropathy. *Proc Natl Acad Sci U S A.* 2012;109:20065-20070.
- 353
- 354 13. Yu H, Koilkonda RD, Chou TH, et al. Consequences of zygote injection and germline  
355 transfer of mutant human mitochondrial DNA in mice. *Proc Natl Acad Sci U S A.*  
356 2015;112:E5689-5698.

357

- 358 14. Yu H, Sant DW, Wang G, Guy J. Mitochondrial transfer of the mutant human  
359 nd6t14484c gene causes visual loss and optic neuropathy. *Transl Vis Sci Technol.*  
360 2020;9:1.
- 361
- 362 15. Qi X, Sun L, Lewin AS, Hauswirth WW, Guy J. The mutant human nd4 subunit of  
363 complex i induces optic neuropathy in the mouse. *Invest Ophthalmol Vis Sci.* 2007;48:1-  
364 10.
- 365
- 366 16. Wang L, Klingeborn M, Travis AM, Hao Y, Arshavsky VY, Gospe SM, 3rd. Progressive  
367 optic atrophy in a retinal ganglion cell-specific mouse model of complex i deficiency. *Sci*  
368 *Rep.* 2020;10:16326.
- 369
- 370 17. Lake NJ, Compton AG, Rahman S, Thorburn DR. Leigh syndrome: One disorder, more  
371 than 75 monogenic causes. *Ann Neurol.* 2016;79:190-203.
- 372
- 373 18. Kruse SE, Watt WC, Marcinek DJ, Kapur RP, Schenkman KA, Palmiter RD. Mice with  
374 mitochondrial complex i deficiency develop a fatal encephalomyopathy. *Cell Metab.*  
375 2008;7:312-320.
- 376
- 377 19. Quintana A, Kruse SE, Kapur RP, Sanz E, Palmiter RD. Complex i deficiency due to loss  
378 of ndufs4 in the brain results in progressive encephalopathy resembling leigh syndrome.  
379 *Proc Natl Acad Sci U S A.* 2010;107:10996-11001.

- 380
- 381 20. Song L, Yu A, Murray K, Cortopassi G. Bipolar cell reduction precedes retinal ganglion  
382 neuron loss in a complex 1 knockout mouse model. *Brain Res.* 2017;1657:232-244.
- 383
- 384 21. Johnson SC, Yanos ME, Kayser EB, et al. Mtor inhibition alleviates mitochondrial  
385 disease in a mouse model of leigh syndrome. *Science.* 2013;342:1524-1528.
- 386
- 387 22. Lee CF, Caudal A, Abell L, Nagana Gowda GA, Tian R. Targeting nad(+) metabolism as  
388 interventions for mitochondrial disease. *Sci Rep.* 2019;9:3073.
- 389
- 390 23. Frambach S, van de Wal MAE, van den Broek PHH, et al. Effects of clofibrate and  
391 kh176 on life span and motor function in mitochondrial complex i-deficient mice.  
392 *Biochim Biophys Acta Mol Basis Dis.* 2020;1866:165727.
- 393
- 394 24. Lyu J, Zhao Y, Zhang N, et al. Bezafibrate rescues mitochondrial encephalopathy in mice  
395 via induction of daily torpor and hypometabolic state. *Neurotherapeutics.* 2022;19:994-  
396 1006.
- 397
- 398 25. Perry EA, Bennett CF, Luo C, et al. Tetracyclines promote survival and fitness in  
399 mitochondrial disease models. *Nat Metab.* 2021;3:33-42.

400

- 401 26. Liu S, Fu S, Wang G, et al. Glycerol-3-phosphate biosynthesis regenerates cytosolic  
402 nad(+) to alleviate mitochondrial disease. *Cell Metab.* 2021;33:1974-1987 e1979.  
403
- 404 27. Reynaud-Dulaurier R, Benegiamo G, Marrocco E, et al. Gene replacement therapy  
405 provides benefit in an adult mouse model of leigh syndrome. *Brain.* 2020;143:1686-1696.  
406
- 407 28. Ferrari M, Jain IH, Goldberger O, et al. Hypoxia treatment reverses neurodegenerative  
408 disease in a mouse model of leigh syndrome. *Proc Natl Acad Sci U S A.*  
409 2017;114:E4241-E4250.  
410
- 411 29. Jain IH, Zazzeron L, Goli R, et al. Hypoxia as a therapy for mitochondrial disease.  
412 *Science.* 2016;352:54-61.  
413
- 414 30. Jain IH, Zazzeron L, Goldberger O, et al. Leigh syndrome mouse model can be rescued  
415 by interventions that normalize brain hyperoxia, but not hif activation. *Cell Metab.*  
416 2019;30:824-832 e823.  
417
- 418 31. Gospe SM, 3rd, Travis AM, Kolesnikov AV, et al. Photoreceptors in a mouse model of  
419 leigh syndrome are capable of normal light-evoked signaling. *J Biol Chem.*  
420 2019;294:12432-12443.  
421

- 422 32. Schindelin J, Arganda-Carreras I, Frise E, et al. Fiji: An open-source platform for  
423 biological-image analysis. *Nat Methods*. 2012;9:676-682.
- 424
- 425 33. Ritch MD, Hannon BG, Read AT, et al. Axonet: A deep learning-based tool to count  
426 retinal ganglion cell axons. *Sci Rep*. 2020;10:8034.
- 427
- 428 34. Bolea I, Gella A, Sanz E, et al. Defined neuronal populations drive fatal phenotype in a  
429 mouse model of leigh syndrome. *Elife*. 2019;8.
- 430
- 431 35. Stokes JC, Bornstein RL, James K, et al. Leukocytes mediate disease pathogenesis in the  
432 ndufs4(ko) mouse model of leigh syndrome. *JCI Insight*. 2022;7.
- 433
- 434 36. Yu AK, Song L, Murray KD, et al. Mitochondrial complex i deficiency leads to  
435 inflammation and retinal ganglion cell death in the ndufs4 mouse. *Hum Mol Genet*.  
436 2015;24:2848-2860.
- 437
- 438 37. Newman NJ. Hereditary optic neuropathies: From the mitochondria to the optic nerve.  
439 *Am J Ophthalmol*. 2005;140:517-523.
- 440
- 441 38. Grange RMH, Sharma R, Shah H, et al. Hypoxia ameliorates brain hyperoxia and nad(+)  
442 deficiency in a murine model of leigh syndrome. *Mol Genet Metab*. 2021;133:83-93.

443 **FIGURE LEGENDS**

444 **Figure 1. Continuous exposure to 11% O<sub>2</sub> prevents RGC soma degeneration at P60 in**

445 ***Vglut2-Cre;ndufs4<sup>loxP/loxP</sup>* mice.** (A) Representative images obtained from retinal flat mounts at

446 locations 1.0 mm from the optic nerve head, with RGC somas immunolabeled with RNA-

447 Binding Protein 1 (RBPMS1; green). Control *ndufs4<sup>loxP/loxP</sup>* mice lacking Cre recombinase (left

448 panels) and conditional knockout *Vglut2-Cre;ndufs4<sup>loxP/loxP</sup>* mice (right panels) were housed

449 under normoxic conditions (21% O<sub>2</sub>; top row) or under hypoxia (11% O<sub>2</sub>; bottom row) from P25

450 to P60. The reduction of RGC soma density in normoxic *Vglut2-Cre;ndufs4<sup>loxP/loxP</sup>* retinas at P60

451 was prevented by continuous hypoxia. Bar, 20 μm. (B) RGC soma density (RGC somas/μm<sup>2</sup>) for

452 the indicated genotypes and environmental O<sub>2</sub> concentrations are shown at three different

453 distances from the optic nerve head: 0.5, 1.0, and 1.5 mm. *ndufs4<sup>+/+</sup>* indicates intact copies of

454 both alleles (*ndufs4<sup>loxP/loxP</sup>* mice), whereas *ndufs4<sup>-/-</sup>* indicates deletion of both alleles (*Vglut2-*

455 *Cre;ndufs4<sup>loxP/loxP</sup>* mice). Individual data points are depicted as black circles, squares, or

456 triangles. Data are presented as mean ± SEM. Statistical comparisons between groups are

457 indicated above the bars, with the following significance designations: ns, non-significant; \*\*,

458 p≤0.01; \*\*\*, p≤0.001.

459

460 **Figure 2. RGC soma degeneration in *Vglut2-Cre;ndufs4<sup>loxP/loxP</sup>* mice is partially rescued by**

461 **hypoxia at P90.** (A) Representative images obtained from retinal flat mounts at locations 1.0

462 mm from the optic nerve head, with RGC somas immunolabeled with RBPMS1 (green). Control

463 *ndufs4<sup>loxP/loxP</sup>* mice lacking Cre recombinase (left panels), *Vglut2-Cre;ndufs4<sup>loxP/+</sup>* mice with only

464 one allele of *ndufs4* deleted by Cre (middle panels), and *Vglut2-Cre;ndufs4<sup>loxP/loxP</sup>* mice with both

465 alleles of *ndufs4* deleted (right panels) were housed under normoxic conditions (21% O<sub>2</sub>; top

466 row) or under hypoxia (11% O<sub>2</sub>; bottom row) from P25 to P90. Only with deletion of both copies  
467 of *ndufs4* is RGC soma degeneration observed at P90, and this level of degeneration is markedly  
468 reduced by continuous hypoxia. Bar, 20 μm. (B) RGC soma density (RGC somas/μm<sup>2</sup>) for the  
469 indicated genotypes and environmental O<sub>2</sub> concentrations are shown at three different distances  
470 from the optic nerve head: 0.5, 1.0, and 1.5 mm. *ndufs4*<sup>+/+</sup> indicates intact copies of both alleles  
471 (*ndufs4*<sup>loxP/loxP</sup> mice; blue bars), *ndufs4*<sup>+/-</sup> indicates deletion of one allele of *ndufs4* (*Vglut2*-  
472 *Cre*;*ndufs4*<sup>loxP/+</sup> mice; purple bars), and *ndufs4*<sup>-/-</sup> indicates deletion of both alleles (*Vglut2*-  
473 *Cre*;*ndufs4*<sup>loxP/loxP</sup> mice; green bars). Individual data points are overlaid on each bar. Statistical  
474 comparisons between groups are indicated above the bars, with the following significance  
475 designations: ns, non-significant; \*, p≤0.05; \*\*, p≤0.01; \*\*\*, p≤0.001.

476

477

478 **Figure 3. RGC axonal degeneration in *Vglut2-Cre;ndufs4*<sup>loxP/loxP</sup> mice at P60 is prevented by**  
479 **continuous hypoxia.** (A) Representative light micrographs of optic nerve cross sections stained  
480 with methylene blue. Control *Vglut2-Cre;ndufs4*<sup>loxP/+</sup> mice (left column) and conditional  
481 knockout *Vglut2-Cre;ndufs4*<sup>loxP/loxP</sup> mice (right column) were housed under normoxia (21% O<sub>2</sub>,  
482 upper row) or hypoxia (11% O<sub>2</sub>, lower row) from P25 to P60. Bar, 20 μm. (B) RGC axon  
483 densities in optic nerve cross sections determined using AxoNet automated axon quantification.  
484 *ndufs4*<sup>+/-</sup> indicates deletion of one allele of *ndufs4* (*Vglut2-Cre;ndufs4*<sup>loxP/+</sup> mice; purple bars),  
485 and *ndufs4*<sup>-/-</sup> indicates deletion of both alleles (*Vglut2-Cre;ndufs4*<sup>loxP/loxP</sup> mice; green bars). The  
486 O<sub>2</sub> concentration is indicated for each group. Individual data points are depicted as black circles.  
487 Data are presented as mean ± SEM. Statistical comparisons between groups are indicated above  
488 the bars, with the following significance designations: ns, non-significant; \*\*\*, p≤0.001. (C)

489 Electron micrographs (5000X) of optic nerve cross sections at P60 demonstrate preservation of  
490 normal axon morphology and abundance in *Vglut2-Cre;ndufs4<sup>loxP/loxP</sup>* mice raised under  
491 continuous hypoxia (right) compared to normoxia (middle). Bar, 5  $\mu$ m.

492

493 **Figure 4. Retinal ganglion cell axonal degeneration is reduced in P90 *Vglut2-***

494 ***Cre;ndufs4<sup>loxP/loxP</sup>* mice treated with hypoxia.** (A) Representative light micrographs of optic  
495 nerve cross sections stained with methylene blue for *Vglut2-Cre;ndufs4<sup>loxP/+</sup>* control mice kept  
496 under normoxia (21% O<sub>2</sub>, left), *Vglut2-Cre;ndufs4<sup>loxP/loxP</sup>* mice kept under normoxia (middle),  
497 and *Vglut2-Cre;ndufs4<sup>loxP/loxP</sup>* mice treated with hypoxia (11% O<sub>2</sub>, right) from P25 to P90. Bar,  
498 20  $\mu$ m. (B) RGC axon densities in optic nerve cross sections at P90 determined using AxoNet  
499 automated axon quantification. *ndufs4<sup>+/-</sup>* indicates deletion of one allele of *ndufs4* (*Vglut2-*  
500 *Cre;ndufs4<sup>loxP/+</sup>* mice; purple bar), and *ndufs4<sup>-/-</sup>* indicates deletion of both alleles (*Vglut2-*  
501 *Cre;ndufs4<sup>loxP/loxP</sup>* mice; green bars). The O<sub>2</sub> concentration is indicated for each group.

502 Individual data points are depicted as black circles. Data are presented as mean  $\pm$  SEM.

503 Statistical comparisons between groups are indicated above the bars: \*\*\*,  $p \leq 0.001$ . (C) Electron  
504 micrographs with magnifications of 5,000X (top row; bar, 5  $\mu$ m) and 40,000X (bottom two rows;  
505 bar 0.5  $\mu$ m) demonstrate axon density and morphology in P90 optic nerve cross sections from  
506 normoxic *Vglut2-Cre;ndufs4<sup>loxP/+</sup>* control mice (left column) and *Vglut2-Cre;ndufs4<sup>loxP/loxP</sup>* mice  
507 kept under normoxia (middle column) or hypoxia (right column). The higher magnification  
508 images demonstrate typical abnormalities in myelination that occur in *Vglut2-Cre;ndufs4<sup>loxP/loxP</sup>*  
509 optic nerves, including thickening and doubling of the myelin sheaths and incomplete enclosure  
510 of axons. While these abnormalities may be observed in hypoxia-treated animals (right), they are  
511 less frequent and generally less severe.

512

513 **Figure 5. The effect of continuous hypoxia on retinal neuroinflammation in *Vglut2-***

514 ***Cre;ndufs4<sup>loxP/loxP</sup>* mice.** (A) Glial fibrillary acidic protein (GFAP) expression levels in P60  
515 retinal lysates assessed by Western blot, with four replicates each for normoxic control *Vglut2-*  
516 *Cre;ndufs4<sup>loxP/+</sup>* mice (left) and for *Vglut2-Cre;ndufs4<sup>loxP/loxP</sup>* mice exposed to normoxia (middle)  
517 or hypoxia (right). The graph below depicts the relative increase in GFAP band intensity  
518 normalized to the actin compared to the control group. (B) Representative images of P60 retinal  
519 cross sections immunolabeled with GFAP (green). In control *Vglut2-Cre;ndufs4<sup>loxP/+</sup>* mice (left),  
520 GFAP signal is present only in astrocytes of the inner-most retina, whereas in normoxic *Vglut2-*  
521 *Cre;ndufs4<sup>loxP/loxP</sup>* mice (middle), GFAP-positive radial projections of Müller glia are observed.  
522 This reactive gliosis is prevented by treating the mice with hypoxia (right). The graph below  
523 depicts the mean number of GFAP-positive Muller projections identified per 100- $\mu$ m segment of  
524 retina for each group. (C) Western blot assessment of GFAP protein levels in retinal lysates at  
525 P90. As in Panel A, the normalized GFAP band intensity is plotted relative to control. (D)  
526 Representative images of retinal cross sections immunolabeled with GFAP (green) at P90 for the  
527 same experimental groups depicted in Panel B. The abundance of GFAP-positive radial Müller  
528 projections is depicted in the graph below. (E) P60 retinal cross sections were labeled with Iba1  
529 (green) to identify mononuclear inflammatory cells. Bar, 20  $\mu$ m. The mean number of Iba1-  
530 positive cells within the ganglion cell layer (GCL) or inner plexiform layer (IPL) across a retinal  
531 section are depicted in the graph to the right for retinas obtained at P60 and P90. For all graphs,  
532 bars depict mean  $\pm$  SEM, with individual data points displayed; ns, not significant; \*,  $p < 0.05$ .

**A***ndufs4*<sup>loxP/loxP</sup>*Vglut2-Cre; ndufs4*<sup>loxP/loxP</sup>21% O<sub>2</sub>11% O<sub>2</sub>**B****P60**







**A****P60****B****C****P90****D****E**ndufs4<sup>loxp/+</sup>; Vglut2-Cre  
21% O<sub>2</sub>ndufs4<sup>loxp/loxp</sup>; Vglut2-Cre  
21% O<sub>2</sub>ndufs4<sup>loxp/loxp</sup>; Vglut2-Cre  
11% O<sub>2</sub>
